# Supplementary material for: Staphylococcus epidermidis Phages Transduce Antimicrobial Resistance Plasmids and Mobilize Chromosomal Islands
Source: PubMed Central journal article supplement (PMC8125051; doi:10.1128/msphere.00223-21), 2021-05-12
Supplement: mSphere.00223-21-st001.pdf [file mSphere.00223-21-st001.pdf]

**Table S1: Mass spectrometry identification of proteins forming particles of phage 48 propagated on *S. epidermidis* strain SE48.**

| <b>Protein</b>                           | <b>Source</b>        | <b>Gene</b> | <b>MW (kDa)</b> | <b>calc. pI</b> | <b>SAF</b> | <b>NSAF (%)</b> | <b>Sum (Coverage)</b> | <b>Sum (# Peptides)</b> | <b>Sum (# Unique Peptides)</b> |
|------------------------------------------|----------------------|-------------|-----------------|-----------------|------------|-----------------|-----------------------|-------------------------|--------------------------------|
| major capsid protein                     | phage 48             | <i>gp7</i>  | 30              | 5,4             | 0,67       | 43,48           | 67%                   | 18                      | 18                             |
| capsid scaffolding protein               | phage 48             | <i>gp6</i>  | 22              | 4,7             | 0,38       | 24,83           | 57%                   | 12                      | 12                             |
| portal protein                           | phage 48             | <i>gp3</i>  | 56              | 4,8             | 0,14       | 9,14            | 61%                   | 25                      | 25                             |
| capsid morphogenesis protein             | SeCl <sub>SE48</sub> | <i>gp14</i> | 28              | 5,1             | 0,12       | 7,74            | 66%                   | 12                      | 12                             |
| receptor-binding protein                 | phage 48             | <i>gp19</i> | 97              | 7,1             | 0,02       | 1,40            | 23%                   | 14                      | 14                             |
| lower tail fiber                         | phage 48             | <i>gp20</i> | 58              | 5,1             | 0,03       | 1,92            | 24%                   | 10                      | 10                             |
| YopX-like protein                        | phage 48             | <i>gp58</i> | 16              | 4,5             | 0,07       | 4,35            | 39%                   | 4                       | 4                              |
| minor capsid protein                     | phage 48             | <i>gp4</i>  | 37              | 8,6             | 0,02       | 1,44            | 18%                   | 5                       | 5                              |
| tail-associated lysin                    | phage 48             | <i>gp18</i> | 70              | 8,7             | 0,01       | 0,53            | 10%                   | 5                       | 5                              |
| Gam-like nuclease inhibitor              | phage 48             | <i>gp40</i> | 18              | 5,5             | 0,02       | 1,62            | 42%                   | 4                       | 4                              |
| adaptor protein                          | phage 48             | <i>gp9</i>  | 12              | 6,0             | 0,03       | 1,88            | 44%                   | 3                       | 3                              |
| ssDNA binding protein                    | phage 48             | <i>gp42</i> | 21              | 6,8             | 0,02       | 1,05            | 23%                   | 3                       | 3                              |
| ERF-like single-strand annealing protein | phage 48             | <i>gp41</i> | 24              | 5,5             | 0,01       | 0,63            | 14%                   | 2                       | 2                              |

Structural proteins of phage and phage-derived small-headed particles purified in CsCl gradient were determined by LC-MS/MS analysis. (N)SAF - (normalized) spectral abundance factor; Sum (Coverage) - percentage of protein sequence covered by identified peptides; Sum (#Peptides) - number of peptides assigned to protein group, including peptides that are shared with other protein groups; Sum (#Unique peptides) - number of peptides that are unique to the specific protein group.
