# Supplementary material for: Staphylococcus epidermidis Phages Transduce Antimicrobial Resistance Plasmids and Mobilize Chromosomal Islands
Source: PubMed Central journal article supplement (PMC8125051; doi:10.1128/msphere.00223-21), 2021-05-12
Supplement: mSphere.00223-21-st002.pdf [file mSphere.00223-21-st002.pdf]

**Table S2: Annotation of predicted *S. epidermidis* phage 48-encoded proteins compared to phages 27, 456, 459 and E72.**

| Phage 48             |             |                                                |             | Phage 27    |            | Phage 456   |            | Phage 459   |            | Phage E72   |            |
|----------------------|-------------|------------------------------------------------|-------------|-------------|------------|-------------|------------|-------------|------------|-------------|------------|
| module               | gene        | putative product                               | length (aa) | gene        | identity % | gene        | identity % | gene        | identity % | gene        | identity % |
| structural proteins  | <i>gp1</i>  | terminase small subunit (TerS)                 | 126         | <i>gp1</i>  | 100.0      | <i>gp1</i>  | 22.2       | <i>gp1</i>  | 22.2       | <i>gp1</i>  | 100.0      |
|                      | <i>gp2</i>  | terminase large subunit (TerL)                 | 421         | <i>gp2</i>  | 99.5       | <i>gp2</i>  | 98.8       | <i>gp2</i>  | 99.5       | <i>gp2</i>  | 97.6       |
|                      | <i>gp3</i>  | portal protein (Prt)                           | 478         | <i>gp3</i>  | 99.0       | <i>gp3</i>  | 99.0       | <i>gp3</i>  | 99.0       | <i>gp3</i>  | 98.5       |
|                      | <i>gp4</i>  | minor capsid protein                           | 317         | <i>gp4</i>  | 96.5       | <i>gp4</i>  | 96.5       | <i>gp4</i>  | 96.5       | <i>gp4</i>  | 96.5       |
|                      | <i>gp5</i>  | hypothetical protein                           | 68          | <i>gp5</i>  | 82.4       | <i>gp5</i>  | 82.4       | <i>gp5</i>  | 82.4       | <i>gp6</i>  | 82.4       |
|                      | <i>gp6</i>  | capsid scaffolding protein (Csp)               | 197         | <i>gp6</i>  | 30.1       | <i>gp6</i>  | 30.1       | <i>gp6</i>  | 30.1       | <i>gp7</i>  | 47.1       |
|                      | <i>gp7</i>  | major capsid protein (Mcp)                     | 276         |             | ns         |             | ns         |             | ns         | <i>gp8</i>  | 99.6       |
|                      | <i>gp8</i>  | Rho termination factor                         | 96          | <i>gp8</i>  | 96.9       | <i>gp8</i>  | 96.9       | <i>gp8</i>  | 96.9       | <i>gp9</i>  | 99.0       |
|                      | <i>gp9</i>  | adaptor protein                                | 104         | <i>gp9</i>  | 98.1       | <i>gp9</i>  | 98.1       | <i>gp9</i>  | 98.1       | <i>gp10</i> | 98.1       |
|                      | <i>gp10</i> | stopper protein                                | 109         | <i>gp10</i> | 99.1       | <i>gp10</i> | 99.1       | <i>gp10</i> | 99.1       | <i>gp11</i> | 98.2       |
|                      | <i>gp11</i> | tail complementation protein                   | 137         | <i>gp11</i> | 98.5       | <i>gp11</i> | 98.5       | <i>gp11</i> | 98.5       | <i>gp12</i> | 98.5       |
|                      | <i>gp12</i> | tail terminator                                | 145         | <i>gp12</i> | 93.1       | <i>gp12</i> | 93.1       | <i>gp12</i> | 93.1       | <i>gp13</i> | 93.8       |
|                      | <i>gp13</i> | major tail protein (Mtp)                       | 179         | <i>gp13</i> | 99.4       | <i>gp13</i> | 99.4       | <i>gp13</i> | 99.4       | <i>gp14</i> | 98.3       |
|                      | <i>gp14</i> | tail assembly chaperone                        | 164         | <i>gp14</i> | 100.0      | <i>gp14</i> | 100.0      | <i>gp14</i> | 100.0      | <i>gp15</i> | 98.8       |
|                      | <i>gp15</i> | tail assembly chaperone                        | 100         | <i>gp15</i> | 89.0       | <i>gp15</i> | 89.0       | <i>gp15</i> | 89.0       | <i>gp16</i> | 89.0       |
|                      | <i>gp16</i> | tape measure protein (Tmp)                     | 1034        | <i>gp16</i> | 96.8       | <i>gp16</i> | 94.3       | <i>gp16</i> | 96.8       | <i>gp17</i> | 93.8       |
|                      | <i>gp17</i> | distal tail protein (Dit)                      | 312         | <i>gp17</i> | 96.5       | <i>gp17</i> | 99.0       | <i>gp17</i> | 96.5       | <i>gp18</i> | 97.8       |
|                      | <i>gp18</i> | tail-associated lysin (Tal)                    | 618         | <i>gp18</i> | 99.4       | <i>gp18</i> | 98.5       | <i>gp18</i> | 99.4       | <i>gp19</i> | 99.0       |
|                      | <i>gp19</i> | receptor-binding protein (Rbp)                 | 888         | <i>gp19</i> | 97.8       | <i>gp19</i> | 97.2       | <i>gp19</i> | 97.8       | <i>gp20</i> | 97.3       |
|                      | <i>gp20</i> | lower tail fiber protein (FibL)                | 510         | <i>gp20</i> | 98.8       | <i>gp20</i> | 98.8       | <i>gp20</i> | 98.8       | <i>gp21</i> | 98.6       |
|                      | <i>gp21</i> | tail fiber assembly protein                    | 112         | <i>gp21</i> | 98.2       | <i>gp21</i> | 98.2       | <i>gp21</i> | 98.2       | <i>gp22</i> | 98.2       |
|                      | <i>gp22</i> | tail chaperone                                 | 46          | <i>gp22</i> | 100.0      | <i>gp22</i> | 100.0      | <i>gp22</i> | 100.0      | <i>gp23</i> | 100.0      |
|                      | <i>gp23</i> | holin regulator                                | 99          | <i>gp23</i> | 100.0      | <i>gp23</i> | 100.0      | <i>gp23</i> | 100.0      | <i>gp24</i> | 78.8       |
|                      | <i>gp24</i> | cell wall hydrolase (Hyd)                      | 633         | <i>gp24</i> | 98.0       | <i>gp24</i> | 97.6       | <i>gp24</i> | 94.2       | <i>gp25</i> | 95.3       |
|                      | <i>gp25</i> | upper tail fiber protein (FibU)                | 169         | <i>gp25</i> | 97.0       |             | ns         | <i>gp25</i> | 97.0       | <i>gp26</i> | 98.8       |
|                      | <i>gp26</i> | hypothetical protein                           | 175         | <i>gp26</i> | 99.4       |             | ns         | <i>gp26</i> | 99.4       | <i>gp27</i> | 98.9       |
| lytic proteins       | <i>gp27</i> | holin (Hol)                                    | 89          | <i>gp27</i> | 86.5       | <i>gp28</i> | 86.5       | <i>gp27</i> | 84.6       | <i>gp28</i> | 87.6       |
|                      | <i>gp28</i> | amidase (Ami)                                  | 467         | <i>gp28</i> | 50.7       | <i>gp29</i> | 50.7       | <i>gp28</i> | 50.7       | <i>gp29</i> | 51.2       |
| lysogenic conversion | <i>gp29</i> | hypothetical protein                           | 37          |             | ns         |             | ns         |             | ns         |             | ns         |
|                      | <i>gp30</i> | DNA binding protein                            | 73          |             | ns         |             | ns         |             | ns         |             | ns         |
|                      | <i>gp31</i> | hypothetical protein                           | 65          |             | ns         |             | ns         |             | ns         |             | ns         |
| lysogeny regulation  | <i>gp32</i> | integrase (Int)                                | 458         | <i>gp30</i> | 96.5       | <i>gp31</i> | 96.3       | <i>gp30</i> | 96.3       | <i>gp33</i> | 96.5       |
|                      | <i>gp33</i> | DUF5067 domain protein                         | 271         | <i>gp31</i> | 100.0      | <i>gp32</i> | 21.4       | <i>gp31</i> | 100.0      | <i>gp34</i> | 20.8       |
|                      | <i>gp34</i> | ImmA/IrrE endopeptidase                        | 156         | <i>gp32</i> | 100.0      | <i>gp33</i> | 46.2       | <i>gp32</i> | 100.0      | <i>gp36</i> | 46.8       |
|                      | <i>gp35</i> | CI-like repressor (CI)                         | 104         | <i>gp33</i> | 100.0      |             | ns         | <i>gp33</i> | 100.0      | <i>gp37</i> | 28.4       |
|                      | <i>gp36</i> | Cro-like repressor (Cro)                       | 85          | <i>gp34</i> | 100.0      |             | ns         | <i>gp34</i> | 98.8       |             | ns         |
|                      | <i>gp37</i> | antirepressor (Ant)                            | 246         | <i>gp35</i> | 100.0      |             | ns         | <i>gp35</i> | 99.6       |             | ns         |
| DNA metabolism       | <i>gp38</i> | hypothetical protein                           | 31          | <i>gp36</i> | 100.0      | <i>gp41</i> | 78.4       | <i>gp36</i> | 100.0      | <i>gp42</i> | 83.8       |
|                      | <i>gp39</i> | hypothetical protein                           | 83          | <i>gp37</i> | 100.0      |             | ns         |             | ns         |             | ns         |
|                      | <i>gp40</i> | Gam-like nuclease inhibitor (Gam)              | 161         | <i>gp38</i> | 100.0      |             | ns         |             | ns         |             | ns         |
|                      | <i>gp41</i> | ERF-like single strand annealing protein (Erf) | 207         | <i>gp39</i> | 100.0      |             | ns         |             | ns         |             | ns         |
|                      | <i>gp42</i> | single stranded DNA binding protein (Ssb)      | 186         | <i>gp40</i> | 100.0      | <i>gp45</i> | 30.1       | <i>gp40</i> | 31.2       | <i>gp46</i> | 31.7       |

**Table S2: Annotation of predicted *S. epidermidis* phage 48-encoded proteins compared to phages 27, 456, 459 and E72. (continued)**

| module         | Phage 48    |                                      |             | Phage 27    |            | Phage 456   |            | Phage 459   |            | Phage E72   |            |
|----------------|-------------|--------------------------------------|-------------|-------------|------------|-------------|------------|-------------|------------|-------------|------------|
|                | gene        | putative product                     | length (aa) | gene        | identity % | gene        | identity % | gene        | identity % | gene        | identity % |
| DNA metabolism | <i>gp43</i> | HNHc nuclease (Hnh)                  | 229         | <i>gp41</i> | 100.0      | <i>gp46</i> | 72.9       | <i>gp41</i> | 75.1       | <i>gp47</i> | 83.8       |
|                | <i>gp44</i> | XRE family transcriptional regulator | 76          | <i>gp42</i> | 100.0      |             | ns         | <i>gp42</i> | 98.7       |             | ns         |
|                | <i>gp45</i> | transcription factor                 | 257         | <i>gp43</i> | 100.0      |             | ns         |             | ns         |             | ns         |
|                | <i>gp46</i> | DNA replication protein DnaD         | 259         | <i>gp44</i> | 100.0      |             | ns         |             | ns         |             | ns         |
|                | <i>gp47</i> | replicative DNA helicase DnaB        | 256         | <i>gp45</i> | 99.6       |             | ns         |             | ns         |             | ns         |
|                | <i>gp48</i> | host DNA synthesis inhibitor Sri     | 53          | <i>gp46</i> | 100.0      |             | ns         |             | ns         |             | ns         |
|                | <i>gp49</i> | DUF3269 domain protein               | 81          | <i>gp47</i> | 100.0      | <i>gp51</i> | 98.8       |             | ns         | <i>gp52</i> | 96.3       |
|                | <i>gp50</i> | Holliday junction resolvase (RusA)   | 135         | <i>gp48</i> | 100.0      |             | ns         |             | ns         | <i>gp53</i> | 100.0      |
|                | <i>gp51</i> | hypothetical protein                 | 63          | <i>gp49</i> | 100.0      |             | ns         | <i>gp51</i> | 88.9       | <i>gp54</i> | 93.7       |
|                | <i>gp52</i> | PVL ORF-50-like protein              | 119         | <i>gp50</i> | 100.0      | <i>gp54</i> | 95.0       | <i>gp52</i> | 95.0       | <i>gp55</i> | 98.3       |
|                | <i>gp53</i> | nucleotide kinase                    | 150         | <i>gp51</i> | 100.0      | <i>gp55</i> | 69.9       | <i>gp53</i> | 39.8       | <i>gp56</i> | 70.6       |
|                | <i>gp54</i> | hypothetical protein                 | 95          | <i>gp52</i> | 100.0      |             | ns         |             | ns         |             | ns         |
|                | <i>gp55</i> | HNH homing endonuclease              | 226         | <i>gp53</i> | 100.0      | <i>gp56</i> | 95.6       | <i>gp54</i> | 97.4       | <i>gp57</i> | 93.8       |
|                | <i>gp56</i> | hypothetical protein                 | 64          | <i>gp54</i> | 100.0      | <i>gp57</i> | 85.9       | <i>gp55</i> | 77.3       | <i>gp58</i> | 87.7       |
|                | <i>gp57</i> | hypothetical protein                 | 87          | <i>gp55</i> | 100.0      |             | ns         |             | ns         |             | ns         |
|                | <i>gp58</i> | YopX-like protein                    | 135         | <i>gp56</i> | 100.0      |             | ns         |             | ns         |             | ns         |
|                | <i>gp59</i> | hypothetical protein                 | 55          | <i>gp57</i> | 100.0      | <i>gp59</i> | 23.8       | <i>gp56</i> | 23.2       | <i>gp62</i> | 54.4       |
|                | <i>gp60</i> | hypothetical protein                 | 59          | <i>gp58</i> | 100.0      | <i>gp60</i> | 93.2       | <i>gp58</i> | 94.9       | <i>gp63</i> | 33.3       |
|                | <i>gp61</i> | dUTP diphosphatase (Dut)             | 175         | <i>gp59</i> | 100.0      |             | ns         |             | ns         |             | ns         |
|                | <i>gp62</i> | membrane-associated protein          | 77          | <i>gp60</i> | 100.0      | <i>gp62</i> | 96.1       | <i>gp60</i> | 98.7       |             | ns         |
|                | <i>gp63</i> | hypothetical protein                 | 83          | <i>gp61</i> | 100.0      | <i>gp63</i> | 96.4       | <i>gp61</i> | 100.0      |             | ns         |
|                | <i>gp64</i> | transcription activator RinB         | 56          | <i>gp62</i> | 100.0      | <i>gp64</i> | 91.1       | <i>gp62</i> | 89.3       | <i>gp67</i> | 85.7       |
|                | <i>gp65</i> | membrane-associated protein          | 72          | <i>gp63</i> | 100.0      |             | ns         |             | ns         |             | ns         |
|                | <i>gp66</i> | membrane-associated protein          | 46          | <i>gp64</i> | 97.8       | <i>gp67</i> | 87.0       | <i>gp64</i> | 87.0       | <i>gp69</i> | 87.0       |
|                | <i>gp67</i> | hypothetical protein                 | 72          | <i>gp65</i> | 100.0      |             | ns         |             | ns         | <i>gp70</i> | 97.2       |
|                | <i>gp68</i> | transcriptional regulator RinA       | 138         | <i>gp66</i> | 100.0      | <i>gp68</i> | 99.3       | <i>gp65</i> | 99.3       | <i>gp71</i> | 100.0      |

ns - no significant similarity (E value > 0.0001); the abbreviations used in this work are given in parentheses after the product name. Identity value is based on Emboss Needle optimal global sequence alignment.
