# Supplementary material for: Staphylococcus epidermidis Phages Transduce Antimicrobial Resistance Plasmids and Mobilize Chromosomal Islands
Source: PubMed Central journal article supplement (PMC8125051; doi:10.1128/msphere.00223-21), 2021-05-12
Supplement: mSphere.00223-21-st003.pdf [file mSphere.00223-21-st003.pdf]

**Table S3: Transfer of plasmid pBTn via electroporation and transduction mediated by phages 187 and E72.**

| <i>S. epidermidis</i><br>strain | ST type  | Transfer via<br>electroporation | Transduction rate    |                      |
|---------------------------------|----------|---------------------------------|----------------------|----------------------|
|                                 |          |                                 | phage 187            | phage E72            |
| E12                             | 19       | ns                              | ns                   | ns                   |
| E14                             | new type | ns                              | ns                   | ns                   |
| E16                             | 457      | ns                              | ns                   | ns                   |
| E18                             | 65       | ns                              | $1.0 \times 10^{-8}$ | $4.3 \times 10^{-6}$ |
| E20                             | 153      | ns                              | $7.0 \times 10^{-8}$ | $5.1 \times 10^{-8}$ |
| E21                             | 130      | yes                             | $1.0 \times 10^{-6}$ | $6.6 \times 10^{-8}$ |
| E23                             | 795      | ns                              | ns                   | $1.3 \times 10^{-4}$ |
| E24                             | 73       | ns                              | $1.3 \times 10^{-7}$ | ns                   |
| E28                             | 5        | ns                              | ns                   | ns                   |
| E30                             | 5        | yes                             | ns                   | ns                   |
| E31                             | 5        | ns                              | ns                   | $1.6 \times 10^{-6}$ |
| E33                             | 640      | ns                              | ns                   | $1.7 \times 10^{-6}$ |
| E34                             | new type | yes                             | ns                   | $1.9 \times 10^{-6}$ |
| E43                             | 327      | yes                             | $5.0 \times 10^{-9}$ | $1.3 \times 10^{-4}$ |
| E44                             | new type | yes                             | $5.2 \times 10^{-8}$ | ns                   |
| E46                             | 944      | yes                             | ns                   | $1.3 \times 10^{-4}$ |
| E47                             | 89       | ns                              | $6.0 \times 10^{-8}$ | ns                   |
| E53                             | 2        | yes                             | ns                   | $6.7 \times 10^{-8}$ |
| E55                             | new type | ns                              | ns                   | ns                   |
| E57                             | 5        | ns                              | $1.8 \times 10^{-8}$ | ns                   |
| E63                             | 66       | ns                              | ns                   | $1.3 \times 10^{-4}$ |
| E64                             | 5        | yes                             | $1.0 \times 10^{-8}$ | $1.8 \times 10^{-6}$ |
| E65                             | 5        | ns                              | ns                   | ns                   |
| E66                             | 5        | yes                             | $3.0 \times 10^{-7}$ | ns                   |
| E72                             | 5        | ns                              | ns                   | $1.1 \times 10^{-8}$ |
| E77                             | 73       | ns                              | $5.0 \times 10^{-9}$ | $3.7 \times 10^{-8}$ |
| E88                             | 2        | ns                              | ns                   | $4.0 \times 10^{-6}$ |
| E89                             | 5        | yes                             | ns                   | ns                   |
| E90                             | new type | ns                              | ns                   | $3.3 \times 10^{-6}$ |
| E91                             | 5        | ns                              | ns                   | $1.1 \times 10^{-7}$ |
| E95                             | 35       | yes                             | ns                   | $8.4 \times 10^{-8}$ |
| E97                             | 736      | ns                              | $1.8 \times 10^{-8}$ | $2.6 \times 10^{-6}$ |
| E98                             | 5        | ns                              | ns                   | $2.3 \times 10^{-7}$ |
| E102                            | 130      | ns                              | ns                   | $1.8 \times 10^{-5}$ |
| E103                            | 130      | ns                              | ns                   | ns                   |
| E108                            | new type | ns                              | ns                   | ns                   |
| E113                            | 981      | ns                              | ns                   | ns                   |

The ratio of transduction is presented as the number of transductants per ml phage lysate relative to the transducing phage titer; each transduction was carried out in triplicates and the average rate is provided. ns – transfer not successful.
